# Supplementary material for: Direct aerobic liquid phase epoxidation of propylene catalyzed by Mn(iii) porphyrin under mild conditions: evidence for the existence of both peroxide and Mn(iv)-oxo species from in situ characterizations
Source: Royal Society of Chemistry journal article supplement (doi:10.1039/c4ra15601c), 2015-01-01
Supplement: c4ra15601c1.pdf [file c4ra15601c1.pdf]

## Supporting Information

### Direct aerobic liquid phase epoxidation of propylene catalyzed by Mn(III) porphyrin under mild conditions: Evidence for the existence of both peroxide and Mn(IV)-oxo species from *in situ* characterizations

Yang Li, Xiantai Zhou\*, Shaoyun Chen, Rongchang Luo, Jun Jiang, Zhongxiu Liang, Hongbing Ji\*

School of Chemistry and Chemical Engineering, Key Laboratory of Low-Carbon Chemistry & Energy Conservation of Guangdong Province, Sun Yat-sen University, Guangzhou 510275, China

Corresponding author. Tel & Fax: +86-20-84113653.

E-mail address: zhoux tai@mail.sysu.edu.cn (X. T. Zhou), jihb@mail.sysu.edu.cn (H. B. Ji)

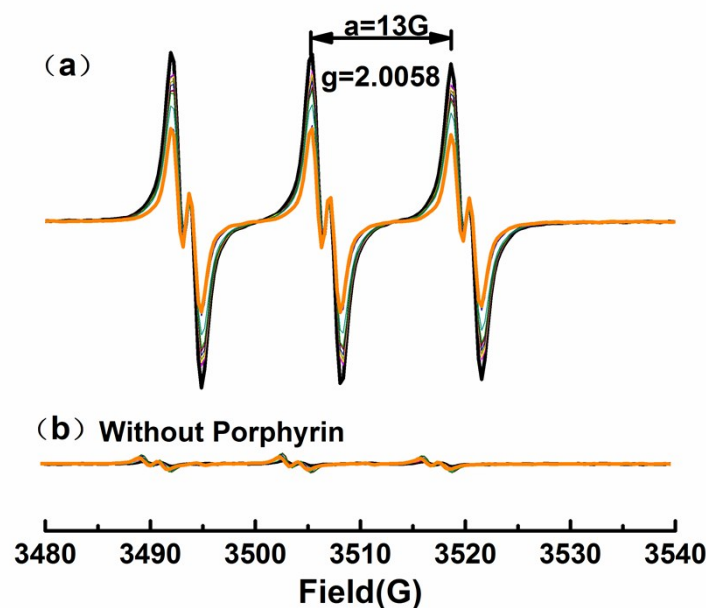

Fig. S1 ESR spectrum of reaction solution. (a) 10mM Benzaldehyde + 1uM MnTPPCl + PBN+ O<sub>2</sub>; (b) 10mM Benzaldehyde + PBN+ O<sub>2</sub>

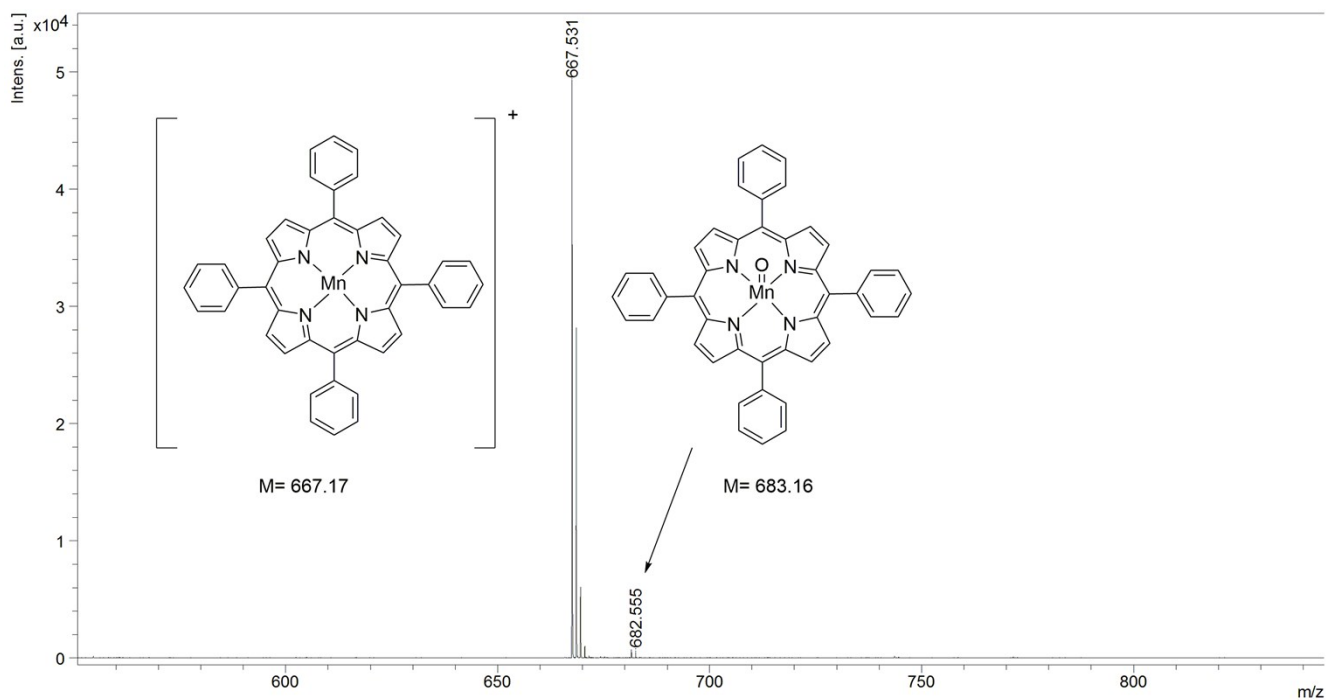

Fig. S2 MS spectrum of the reaction sample. Reaction condition: MnTPPCL,  $1 \times 10^{-2}$  mol L<sup>-1</sup>; Solvent, ethyl acetate, 40 mL; BA, 10 mM,

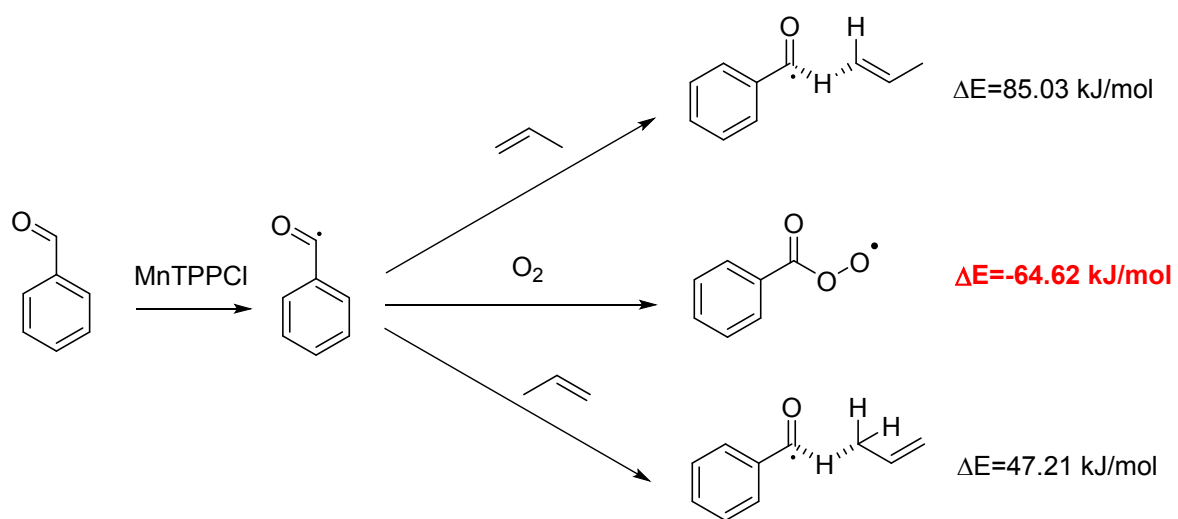

Fig. S3 Plausible reaction for benzoic radical and propylene

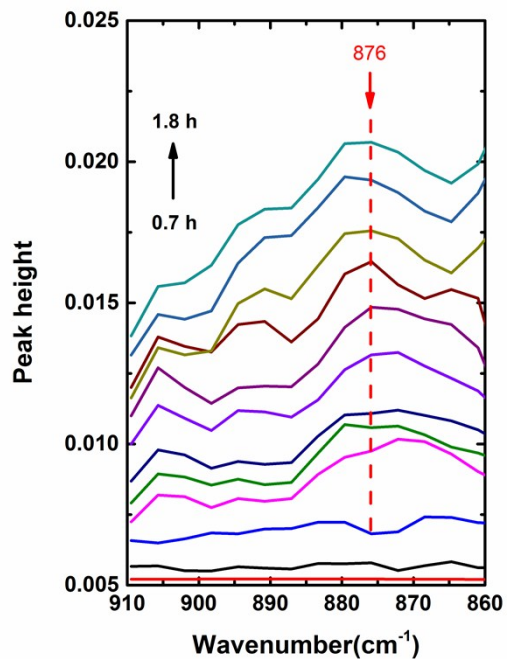

Fig. S4 Spectrums of the reaction solution by *in situ* FT-IR

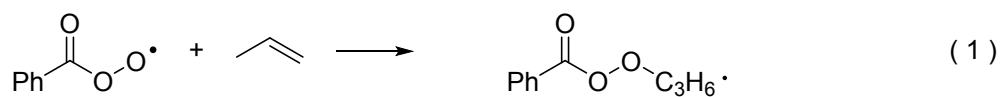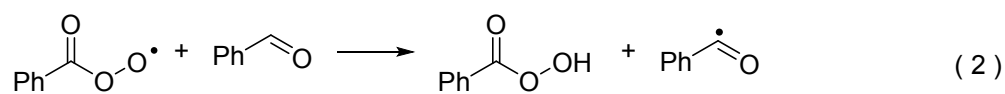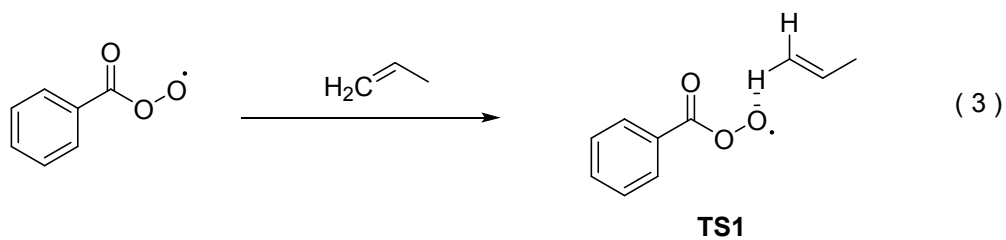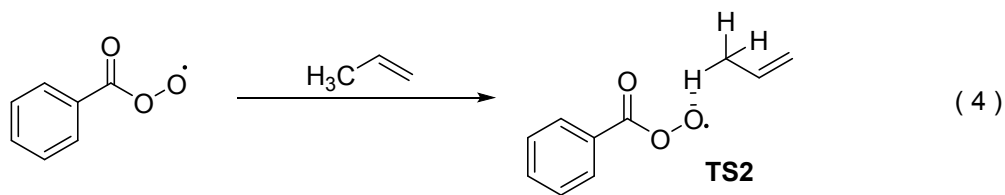

Fig. S5 Competition between benzaldehyde and propylene when react with benzoyl peroxide radical

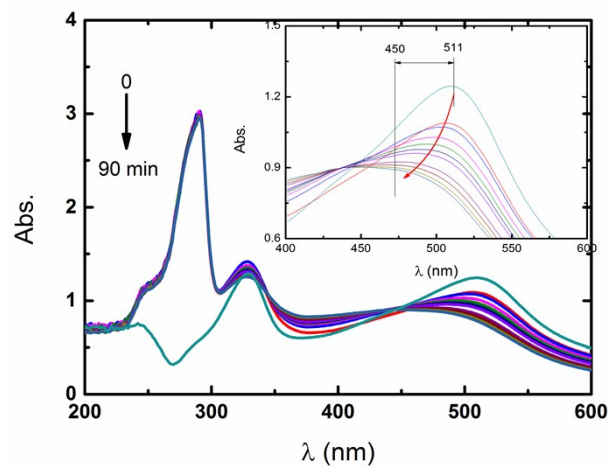

Fig. S6 UV spectrum of DPPH after add reaction solution. DPPH: 0.1 M (acetonitrile), reaction solution/DPPH: 1:50
